# Supplementary material
Source: PubMed Central journal article supplement (PMC3941995)
Supplement: NIHMS548342-supplement-1.pdf [file NIHMS548342-supplement-1.pdf]

**Online Appendix for the following *JACC* article**

**TITLE:** Cardiac Size and Sex Matching in Heart Transplantation

**AUTHORS:** Robert M. Reed, MD, Giora Netzer, MD, MSCE, Lawrence Hunsicker, MD, Braxton D. Mitchell, PHD, Keshava Rajagopal, MD, PHD, Steven Scharf, MD, PHD, Michael Eberlein, MD, PHD

---

**APPENDIX**

**Supplemental Material**

**Table S1: Survival by quantiles of difference in weight versus difference in predicted cardiac mass**

|                                       | Survival 1 Yr<br>Weight-Difference |        | Survival 1 yr<br>Cardiac Mass-<br>Difference |        | Survival 5 Yr<br>Weight-Difference |        | Survival 5 yr<br>Cardiac Mass-<br>Difference |        |
|---------------------------------------|------------------------------------|--------|----------------------------------------------|--------|------------------------------------|--------|----------------------------------------------|--------|
|                                       | HR (95% CI)                        | P      | HR (95% CI)                                  | P      | HR (95% CI)                        | P      | HR (95% CI)                                  | P      |
| <b>Unadjusted Models</b>              |                                    |        |                                              |        |                                    |        |                                              |        |
| <b>Quantiles</b>                      |                                    |        |                                              |        |                                    |        |                                              |        |
| 1 (undersized donor)                  | 1.07 (0.95 to 1.21)                | 0.2    | 1.27 (1.13 to 1.43)                          | <0.001 | 1.02 (0.93 to 1.11)                | 0.7    | 1.18 (1.09 to 1.28)                          | <0.001 |
| 2                                     | 1.07 (0.95 to 1.21)                | 0.3    | 1.10 (0.98 to 1.24)                          | 0.1    | 0.98 (0.90 to 1.07)                | 0.6    | 1.07 (0.98 to 1.17)                          | 0.1    |
| 3                                     | 1.06 (0.94 to 1.20)                | 0.3    | 0.96 (0.85 to 1.09)                          | 0.5    | 1.04 (0.95 to 1.13)                | 0.4    | 0.94 (0.86 to 1.03)                          | 0.2    |
| 4 (best fit)                          | Referent                           |        | Referent                                     |        |                                    |        |                                              |        |
| 5                                     | 1.05 (0.93 to 1.18)                | 0.4    | 1.00 (0.88 to 1.13)                          | 1.0    | 1.03 (0.94 to 1.12)                | 0.6    | 1.01 (0.92 to 1.10)                          | 0.9    |
| 6                                     | 1.09 (0.96 to 1.23)                | 0.2    | 1.06 (0.94 to 1.19)                          | 0.4    | 1.03 (0.94 to 1.12)                | 0.5    | 1.03 (0.94 to 1.12)                          | 0.5    |
| 7 (oversized donor)                   | 1.06 (0.94 to 1.19)                | 0.9    | 1.08 (0.96 to 1.22)                          | 0.2    | 0.98 (0.90 to 1.07)                | 0.6    | 1.05 (0.96 to 1.15)                          | 0.3    |
| <b>Gender Categories (unadjusted)</b> |                                    |        |                                              |        |                                    |        |                                              |        |
| Male Recipient Male Donor             | Referent                           |        |                                              |        | Referent                           |        |                                              |        |
| Male Recipient Female Donor           | 1.32 (1.22 to 1.43)                | <0.001 |                                              |        | 1.21 (1.14 to 1.28)                | <0.001 |                                              |        |
| Female Recipient Female Donor         | 1.17 (1.06 to 1.29)                | 0.002  |                                              |        | 1.14 (1.06 to 1.23)                | 0.001  |                                              |        |
| Female Recipient Male Donor           | 1.17 (1.06 to 1.30)                | 0.002  |                                              |        | 1.17 (1.09 to 1.26)                | <0.001 |                                              |        |
| Female Recipient Male Donor†          | 1.00 (0.88 to 1.14)                | 1.0    |                                              |        | 1.03 (0.94 to 1.13)                | 0.5    |                                              |        |
| <b>Adjusted Models‡</b>               |                                    |        |                                              |        |                                    |        |                                              |        |
| <b>Quantiles</b>                      |                                    |        |                                              |        |                                    |        |                                              |        |
| 1 (undersized donor)                  | 1.08 (0.91 to 1.29)                | 0.4    | 1.25 (1.02 to 1.54)                          | 0.03   | 1.01 (0.89 to 1.15)                | 0.8    | 1.20 (1.04 to 1.39)                          | 0.01   |
| 2                                     | 1.10 (0.93 to 1.31)                | 0.3    | 1.14 (0.95 to 1.36)                          | 0.1    | 0.99 (0.88 to 1.13)                | 0.9    | 1.10 (0.97 to 1.25)                          | 0.1    |
| 3                                     | 0.96 (0.81 to 1.14)                | 0.7    | 1.02 (0.85 to 1.23)                          | 0.8    | 0.98 (0.87 to 1.11)                | 0.7    | 1.04 (0.91 to 1.2)                           | 0.6    |
| 4 (best fit)                          | Referent                           |        | Referent                                     |        | Referent                           |        | Referent                                     |        |
| 5                                     | 0.94 (0.79 to 1.12)                | 0.5    | 1.06 (0.89 to 1.26)                          | 0.5    | 0.95 (0.84 to 1.08)                | 0.4    | 1.06 (0.93 to 1.20)                          | 0.4    |
| 6                                     | 0.96 (0.81 to 1.14)                | 0.7    | 1.03 (0.86 to 1.24)                          | 0.7    | 0.94 (0.83 to 1.06)                | 0.3    | 1.06 (0.94 to 1.21)                          | 0.3    |
| 7 (oversized donor)                   | 0.85 (0.71 to 1.01)                | 0.07   | 0.95 (0.78 to 1.16)                          | 0.6    | 0.85 (0.75 to 0.96)                | 0.01   | 0.96 (0.84 to 1.11)                          | 0.6    |
| <b>Gender Categories</b>              |                                    |        |                                              |        |                                    |        |                                              |        |
| Male Recipient Male Donor             | Referent                           |        | Referent                                     |        | Referent                           |        | Referent                                     |        |
| Male Recipient Female Donor           | 1.12 (0.98 to 1.27)                | 0.09   | 1.00 (0.85 to 1.17)                          | 1.0    | 1.04 (0.95 to 1.14)                | 0.4    | 0.95 (0.85 to 1.07)                          | 0.4    |
| Female Recipient Female Donor         | 1.26 (1.08 to 1.47)                | 0.003  | 1.26 (1.08 to 1.47)                          | 0.003  | 1.18 (1.06 to 1.32)                | 0.003  | 1.18 (1.06 to 1.32)                          | 0.003  |
| Female Recipient Male Donor           | 1.55 (1.34 to 1.79)                | <0.001 | 1.62 (1.36 to 1.92)                          | <0.001 | 1.39 (1.25 to 1.55)                | <0.001 | 1.44 (1.27 to 1.63)                          | <0.001 |
| Female Recipient Male Donor†          | 1.22 (1.02 to 1.47)                | 0.03   | 1.28 (1.04 to 1.57)                          | 0.02   | 1.18 (1.03 to 1.35)                | 0.02   | 1.22 (1.05 to 1.41)                          | 0.008  |

†Hazard ratio referent to Female Recipient / Female Donor pairings

‡Additional variables in the models included: recipient age, serum creatinine, total bilirubin, presence of diabetes, pulmonary vascular resistance index, hospitalized status, localization in intensive care unit, mechanical assistance through ventricular assist or extra-corporeal membranous oxygenation, inotrope use, primary indication for transplant, donor age, donor cause of death, ischemic time, and transplant era.

**Table S2: Thirty Day and Time-Uncensored Survival**

|                                       | Survival 30 Day Weight-Difference |        | Survival 30 Day Cardiac Mass-Difference |        | Survival Uncensored Weight-Difference |        | Survival Uncensored Cardiac Mass-Difference |        |
|---------------------------------------|-----------------------------------|--------|-----------------------------------------|--------|---------------------------------------|--------|---------------------------------------------|--------|
|                                       | HR (95% CI)                       | P      | HR (95% CI)                             | P      | HR (95% CI)                           | P      | HR (95% CI)                                 | P      |
| <b>Unadjusted Models</b>              |                                   |        |                                         |        |                                       |        |                                             |        |
| <b>Quantiles</b>                      |                                   |        |                                         |        |                                       |        |                                             |        |
| 1 (undersized donor)                  | 1.11 (0.92 to 1.34)               | 0.3    | 1.36 (1.14 to 1.62)                     | 0.001  | 1.05 (0.99 to 1.12)                   | 0.1    | 1.18 (1.11 to 1.26)                         | <0.001 |
| 2                                     | 1.04 (0.86 to 1.25)               | 0.7    | 1.15 (0.96 to 1.38)                     | 0.1    | 1.02 (0.96 to 1.09)                   | 0.5    | 1.11 (1.04 to 1.18)                         | 0.003  |
| 3                                     | 1.07 (0.89 to 1.29)               | 0.5    | 0.92 (0.76 to 1.12)                     | 0.4    | 1.04 (0.98 to 1.12)                   | 0.2    | 0.99 (0.92 to 1.06)                         | 0.8    |
| 4 (best fit)                          | Referent                          |        | Referent                                |        | Referent                              |        | Referent                                    |        |
| 5                                     | 1.15 (0.96 to 1.38)               | 0.1    | 0.94 (0.78 to 1.14)                     | 0.5    | 1.02 (0.95 to 1.09)                   | 0.6    | 1.05 (0.98 to 1.12)                         | 0.2    |
| 6                                     | 1.13 (0.94 to 1.36)               | 0.2    | 1.03 (0.86 to 1.25)                     | 0.7    | 1.05 (0.98 to 1.12)                   | 0.2    | 1.06 (0.99 to 1.13)                         | 0.1    |
| 7 (oversized donor)                   | 1.02 (0.84 to 1.23)               | 0.9    | 1.01 (0.83 to 1.22)                     | 0.9    | 1.00 (0.94 to 1.07)                   | 0.9    | 1.03 (0.96 to 1.10)                         | 0.4    |
| <b>Gender Categories (unadjusted)</b> |                                   |        |                                         |        |                                       |        |                                             |        |
| Male Recipient / Male Donor           | Referent                          |        | Referent                                |        | Referent                              |        | Referent                                    |        |
| Male Recipient / Female Donor         | 1.56 (1.38 to 1.77)               | <0.001 |                                         |        | 1.15 (1.10 to 1.20)                   | <0.001 |                                             |        |
| Female Recipient / Female Donor       | 1.26 (1.08 to 1.47)               | 0.004  |                                         |        | 1.06 (1.00 to 1.13)                   | 0.04   |                                             |        |
| Female Recipient / Male Donor         | 1.19 (1.01 to 1.39)               | 0.04   |                                         |        | 1.03 (0.97 to 1.09)                   | 0.3    |                                             |        |
| Female Recipient / Male Donor†        | 0.94 (0.77 to 1.15)               | 0.6    |                                         |        | 0.97 (0.90 to 1.05)                   | 0.4    |                                             |        |
| <b>Adjusted Models‡</b>               |                                   |        |                                         |        |                                       |        |                                             |        |
| <b>Quantiles</b>                      |                                   |        |                                         |        |                                       |        |                                             |        |
| 1 (undersized donor)                  | 1.22 (0.93 to 1.61)               | 0.2    | 1.11 (0.80 to 1.52)                     | 0.5    | 1.07 (0.97 to 1.18)                   | 0.2    | 1.20 (1.07 to 1.35)                         | 0.002  |
| 2                                     | 1.06 (0.80 to 1.40)               | 0.7    | 1.18 (0.90 to 1.55)                     | 0.2    | 1.05 (0.95 to 1.16)                   | 0.4    | 1.11 (1.00 to 1.23)                         | 0.046  |
| 3                                     | 1.19 (0.90 to 1.56)               | 0.2    | 1.03 (0.78 to 1.37)                     | 0.8    | 1.04 (0.94 to 1.14)                   | 0.5    | 1.03 (0.93 to 1.14)                         | 0.6    |
| 4 (best fit)                          | Referent                          |        | Referent                                |        | Referent                              |        | Referent                                    |        |
| 5                                     | 1.12 (0.85 to 1.47)               | 0.4    | 0.98 (0.74 to 1.30)                     | 0.9    | 0.98 (0.89 to 1.09)                   | 0.7    | 1.07 (0.97 to 1.18)                         | 0.2    |
| 6                                     | 1.09 (0.83 to 1.43)               | 0.5    | 1.01 (0.77 to 1.34)                     | 0.9    | 1.00 (0.90 to 1.10)                   | 0.9    | 1.07 (0.97 to 1.19)                         | 0.2    |
| 7 (oversized donor)                   | 0.88 (0.66 to 1.18)               | 0.4    | 0.92 (0.68 to 1.25)                     | 0.6    | 0.95 (0.86 to 1.05)                   | 0.3    | 1.01 (0.90 to 1.13)                         | 0.8    |
| <b>Gender Categories</b>              |                                   |        |                                         |        |                                       |        |                                             |        |
| Male Recipient / Male Donor           | Referent                          |        | Referent                                |        | Referent                              |        | Referent                                    |        |
| Male Recipient / Female Donor         | 1.20 (0.99 to 1.46)               | 0.06   | 1.13 (0.89 to 1.44)                     | 0.3    | 1.03 (0.96 to 1.11)                   | 0.4    | 0.96 (0.87 to 1.05)                         | 0.3    |
| Female Recipient / Female Donor       | 1.25 (0.98 to 1.61)               | 0.07   | 1.26 (0.98 to 1.61)                     | 0.07   | 1.18 (1.08 to 1.29)                   | <0.001 | 1.19 (1.08 to 1.30)                         | <0.001 |
| Female Recipient / Male Donor         | 1.67 (1.32 to 2.10)               | <0.001 | 1.76 (1.34 to 2.32)                     | <0.001 | 1.25 (1.15 to 1.37)                   | <0.001 | 1.27 (1.15 to 1.41)                         | <0.001 |
| Female Recipient / Male Donor†        | 1.33 (0.98 to 1.79)               | 0.06   | 1.40 (1.01 to 1.95)                     | 0.045  | 1.06 (0.95 to 1.18)                   | 0.3    | 1.07 (0.95 to 1.21)                         | 0.3    |

†Hazard ratio referent to Female Recipient / Female Donor pairings

‡Additional variables in the models included: recipient age, serum creatinine, total bilirubin, presence of diabetes, pulmonary vascular resistance index, hospitalized status, localization in intensive care unit, mechanical assistance through ventricular assist or extra-corporeal membranous oxygenation, inotrope use, primary indication for transplant, donor age, donor cause of death, ischemic time, and transplant era.

**Table S3: Rejection Treated in First Year by septiles of difference in weight versus difference in predicted cardiac mass**

|                                       | Rejection treated in 1 <sup>st</sup> yr Weight-Difference |        | Rejection treated in 1 <sup>st</sup> yr Cardiac Mass-difference |        |
|---------------------------------------|-----------------------------------------------------------|--------|-----------------------------------------------------------------|--------|
|                                       | OR (95% CI)                                               | P      | OR (95% CI)                                                     | P      |
| <b>Unadjusted Models</b>              |                                                           |        |                                                                 |        |
| <b>Quantiles</b>                      |                                                           |        |                                                                 |        |
| 1 (undersized donor)                  | 1.29 (1.15 to 1.44)                                       | <0.001 | 1.33 (1.19 to 1.49)                                             | <0.001 |
| 2                                     | 1.15 (1.03 to 1.29)                                       | 0.01   | 1.04 (0.93 to 1.17)                                             | 0.5    |
| 3                                     | 1.01 (0.91 to 1.13)                                       | 0.8    | 1.02 (0.91 to 1.14)                                             | 0.7    |
| 4 (best fit)                          | Referent                                                  |        | Referent                                                        |        |
| 5                                     | 0.93 (0.83 to 1.04)                                       | 0.2    | 1.00 (0.89 to 1.11)                                             | 1.0    |
| 6                                     | 0.93 (0.83 to 1.04)                                       | 0.2    | 0.98 (0.88 to 1.10)                                             | 0.7    |
| 7 (oversized donor)                   | 0.80 (0.71 to 0.89)                                       | <0.001 | 0.99 (0.88 to 1.11)                                             | 0.8    |
| <b>Gender Categories (unadjusted)</b> |                                                           |        |                                                                 |        |
| Male Recipient Male Donor             | Referent                                                  |        |                                                                 |        |
| Male Recipient Female Donor           | 1.20 (1.10 to 1.30)                                       | <0.001 |                                                                 |        |
| Female Recipient Female Donor         | 1.43 (1.31 to 1.58)                                       | <0.001 |                                                                 |        |
| Female Recipient Male Donor           | 1.51 (1.37 to 1.66)                                       | <0.001 |                                                                 |        |
| Female Recipient Male Donor†          | 1.05 (0.93 to 1.19)                                       | 0.4    |                                                                 |        |
| <b>Adjusted Models‡</b>               |                                                           |        |                                                                 |        |
| <b>Quantiles</b>                      |                                                           |        |                                                                 |        |
| 1 (undersized donor)                  | 1.16 (1.00 to 1.36)                                       | 0.06   | 1.19 (0.99 to 1.44)                                             | 0.07   |
| 2                                     | 1.12 (0.96 to 1.30)                                       | 0.2    | 1.01 (0.86 to 1.18)                                             | 0.9    |
| 3                                     | 1.04 (0.89 to 1.21)                                       | 0.6    | 1.01 (0.87 to 1.18)                                             | 0.9    |
| 4 (best fit)                          | Referent                                                  |        | Referent                                                        |        |
| 5                                     | 0.87 (0.75 to 1.02)                                       | 0.09   | 0.90 (0.77 to 1.05)                                             | 0.2    |
| 6                                     | 1.01 (0.86 to 1.18)                                       | 0.9    | 0.91 (0.77 to 1.06)                                             | 0.2    |
| 7 (oversized donor)                   | 0.80 (0.68 to 0.93)                                       | 0.005  | 0.70 (0.59 to 0.84)                                             | <0.001 |
| <b>Gender Categories</b>              |                                                           |        |                                                                 |        |
| Male Recipient Male Donor             | Referent                                                  |        | Referent                                                        |        |
| Male Recipient Female Donor           | 1.15 (1.02 to 1.30)                                       | 0.02   | 1.00 (0.86 to 1.16)                                             | 1.0    |
| Female Recipient Female Donor         | 1.38 (1.20 to 1.58)                                       | <0.001 | 1.38 (1.20 to 1.59)                                             | <0.001 |
| Female Recipient Male Donor           | 1.31 (1.15 to 1.50)                                       | <0.001 | 1.55 (1.33 to 1.82)                                             | <0.001 |
| Female Recipient Male Donor†          | 0.95 (0.80 to 1.12)                                       | 0.6    | 1.13 (0.94 to 1.35)                                             | 0.2    |

†Hazard ratio referent to Female Recipient / Female Donor pairings

‡Additional variables in the models included: recipient age, serum creatinine, total bilirubin, presence of diabetes, pulmonary vascular resistance index, hospitalized status, localization in intensive care unit, mechanical assistance through ventricular assist or extra-corporeal membranous oxygenation, inotrope use, primary indication for transplant, donor age, donor cause of death, ischemic time, and transplant era.

## Alternate Analysis

An alternate analytical plan was developed prior to full data analysis. For this analysis, quantiles of predicted heart mass were compared against the “best matched” quantile 4 according to survival censored at one year post transplant. Quantiles 1, 7, and quantiles differing from quantile 4 with a p-value  $\leq 0.2$  were to be maintained as independent categories, whereas other quantiles were to be combined. Quantiles 3-6 were similar (all p-values  $> 0.35$ ) and so were consolidated into a “best matched” category. Quantiles 2 (HR 1.10, P=0.1) and 7 (HR 1.08, P=0.2) were maintained as independent categories. This resulted in 4 sizing categories which were used in the alternate analysis presented in subsequent tables. **Table S4** provides heart mass data from the septiles approach, whereas **Table S5** provides the same data according to the sizing categories of the alternate approach. **Table S6** presents demographic data of the alternate size categories comparable to **Table 1**. **Table S7** presents survival and rejection data in unadjusted and fully adjusted models using the alternate sizing categories.

**Table S4: Size Comparison Across Selected Septiles**

|                        | <b>Undersized</b>   | <b>Best Fit</b>     | <b>Oversized</b>    |          |
|------------------------|---------------------|---------------------|---------------------|----------|
|                        | <b>Median(IQR)</b>  | <b>Median(IQR)</b>  | <b>Median(IQR)</b>  | <b>p</b> |
| pHeart mass donor      | 143 (131 to 160)    | 187 (170 to 202)    | 196 (178 to 221)    | 0.0001   |
| pHeart mass recip      | 189 (174 to 208)    | 187 (169 to 201)    | 147 (130 to 167)    | 0.0001   |
| pHeart mass-ratio      | 0.78 (0.73 to 0.81) | 1.00 (0.99 to 1.02) | 1.30 (1.25 to 1.40) | 0.0001   |
| pHeart mass diff (g)   | -42 (-51 to -35)    | 0.7 (-1.7 to 3.2)   | 47 (39 to 57)       | 0.0001   |
| pRV mass donor         | 23 (21 to 26)       | 28 (26 to 32)       | 31 (28 to 34)       | 0.0001   |
| pRV mass recip         | 24 (22 to 27)       | 24 (22 to 26)       | 21 (19 to 23)       | 0.0001   |
| pRVM-ratio             | 0.95 (0.87 to 1.06) | 1.20 (1.09 to 1.34) | 1.47 (1.31 to 1.64) | 0.0001   |
| pRV mass diff (g)      | -1 (-3 to 1)        | 5 (2 to 8)          | 10 (7 to 13)        | 0.0001   |
| pLV mass donor         | 119 (109 to 135)    | 158 (142 to 171)    | 166 (149 to 188)    | 0.0001   |
| pLV mass recip         | 164 (151 to 181)    | 163 (146 to 176)    | 126 (111 to 145)    | 0.0001   |
| pLV mass-ratio         | 0.75 (0.70 to 0.78) | 0.97 (0.95 to 1.00) | 1.29 (1.23 to 1.38) | 0.0001   |
| pLV mass diff (g)      | -42 (-50 to -35)    | -4 (-7 to -1)       | 37 (30 to 47)       | 0.0001   |
| %Heart mass difference | -22 (-27 to -19)    | 0 (-1 to 2)         | 30 (25 to 40)       | 0.0001   |
| %Weight Difference     | -18 (-28 to -9)     | -4 (-9 to 1)        | 31 (15 to 46)       | 0.0001   |

pHeart: predicted values for entire heart, pRV: predicted values for the right ventricle, pLV: predicted values for the left ventricle

**Table S5: Size Comparison Across Selected Categories**

|                        | <b>Most Undersized</b> | <b>Moderately Undersized</b> | <b>Best Fit</b>     | <b>Oversized</b>    |          |
|------------------------|------------------------|------------------------------|---------------------|---------------------|----------|
|                        | <b>Median(IQR)</b>     | <b>Median(IQR)</b>           | <b>Median(IQR)</b>  | <b>Median(IQR)</b>  | <b>p</b> |
| pHeart mass donor      | 143 (131 to 160)       | 173 (152 to 188)             | 189 (170 to 205)    | 196 (178 to 221)    | 0.0001   |
| pHeart mass recip      | 189 (174 to 208)       | 195 (172 to 213)             | 182 (162 to 199)    | 147 (130 to 167)    | 0.0001   |
| pHeart mass-ratio      | 0.78 (0.73 to 0.81)    | 0.89 (0.87 to 0.90)          | 1.04 (0.98 to 1.10) | 1.30 (1.25 to 1.40) | 0.0001   |
| pHeart mass diff (g)   | -42 (-51 to -35)       | -22 (-26 to -18)             | 6 (-4 to 17)        | 47 (39 to 57)       | 0.0001   |
| pRV mass donor         | 23 (21 to 26)          | 27 (24 to 30)                | 29 (26 to 32)       | 31 (28 to 34)       | 0.0001   |
| pRV mass recip         | 24 (22 to 27)          | 25 (22 to 27)                | 24 (22 to 25)       | 21 (19 to 23)       | 0.0001   |
| pRVM-ratio             | 0.95 (0.87 to 1.06)    | 1.07 (0.98 to 1.20)          | 1.23 (1.11 to 1.37) | 1.47 (1.31 to 1.64) | 0.0001   |
| pRV mass diff (g)      | -1 (-3 to 1)           | 2 (-1 to 5)                  | 5 (2 to 9)          | 10 (7 to 13)        | 0.0001   |
| pLV mass donor         | 119 (109 to 135)       | 145 (127 to 159)             | 159 (142 to 174)    | 166 (149 to 188)    | 0.0001   |
| pLV mass recip         | 164 (151 to 181)       | 170 (150 to 186)             | 159 (140 to 173)    | 126 (111 to 145)    | 0.0001   |
| pLV mass-ratio         | 0.75 (0.70 to 0.78)    | 0.85 (0.83 to 0.88)          | 1.00 (0.95 to 1.07) | 1.29 (1.23 to 1.38) | 0.0001   |
| pLV mass diff (g)      | -42 (-50 to -35)       | -24 (-29 to -20)             | 1 (-9 to 11)        | 37 (30 to 47)       | 0.0001   |
| %Heart mass difference | -22 (-27 to -19)       | -11 (-13 to -10)             | 3 (-2 to 10)        | 30 (25 to 40)       | 0.0001   |
| %Weight Difference     | -18 (-28 to -9)        | -18 (-23 to -6)              | -0.6 (-10 to 12)    | 31 (15 to 46)       | 0.0001   |

pHeart: predicted values for entire heart, pRV: predicted values for the right ventricle, pLV: predicted values for the left ventricle

**Table S6: Demographics By Size Category**

|                                                      | <b>Most Undersized<br/>(septile 1)</b> | <b>Moderately Undersized<br/>(septile 2)</b> | <b>Best Fit<br/>(septiles 3-6)</b> | <b>Oversized<br/>(septile 7)</b> | <b>P</b> |
|------------------------------------------------------|----------------------------------------|----------------------------------------------|------------------------------------|----------------------------------|----------|
| <b>Size Matching</b>                                 |                                        |                                              |                                    |                                  |          |
| %Heart mass difference                               | -22 (-27 to -19)                       | -11 (-13 to -10)                             | 3 (-2 to 10)                       | 30 (25 to 40)                    | 0.0001   |
| %Weight Difference                                   | -18 (-28 to -9)                        | -18 (-23 to -6)                              | -0.6 (-10 to 12)                   | 31 (15 to 46)                    | 0.0001   |
| <b>Gender Matching</b>                               |                                        |                                              |                                    |                                  |          |
| F to F (%)                                           | 3.5%                                   | 11%                                          | 14%                                | 9%                               | <0.001   |
| M to M (%)                                           | 21%                                    | 63%                                          | 73%                                | 40%                              |          |
| M to F (%)                                           | <1%                                    | <1%                                          | 7%                                 | 51%                              |          |
| F to M(%)                                            | 75%                                    | 26%                                          | 6%                                 | <1%                              |          |
| <b>Recipient Factors</b>                             |                                        |                                              |                                    |                                  |          |
| Male gender                                          | 96%                                    | 89%                                          | 79%                                | 40%                              | <0.001   |
| Age (years)                                          | 54 (46 to 60)                          | 54 (46 to 61)                                | 55 (47 to 61)                      | 54 (45 to 60)                    | 0.0001   |
| Hypertension treatment                               | 39%                                    | 39%                                          | 37%                                | 33%                              | <0.001   |
| Body Mass Index (kg/m <sup>2</sup> )                 | 27 (24 to 30)                          | 27 (24 to 30)                                | 26 (23 to 29)                      | 23 (21 to 27)                    | 0.0001   |
| BSA (Mosteller formula)                              | 2.0 (1.9 to 2.2)                       | 2.1 (1.9 to 2.2)                             | 2.0 (1.8 to 2.1)                   | 1.7 (1.6 to 1.9)                 | 0.0001   |
| Diabetes (%)                                         | 8%                                     | 13%                                          | 11%                                | 9%                               | <0.001   |
| Creatinine (mg/dL)                                   | 1.2 (1 to 1.5)                         | 1.2 (1 to 1.5)                               | 1.2 (1 to 1.5)                     | 1.1 (0.9 to 1.4)                 | 0.0001   |
| Bilirubin (mg/dL)                                    | 0.8 (0.6 to 1.3)                       | 0.8 (0.6 to 1.2)                             | 0.8 (0.5 to 1.3)                   | 0.8 (0.5 to 1.3)                 | 0.3      |
| PRA peak class I                                     | 20 (5 to 43)                           | 19 (7 to 43)                                 | 19 (7 to 49)                       | 32 (10 to 65)                    | 0.0001   |
| PRA peak class II                                    | 18 (7 to 51)                           | 16.5 (6 to 46)                               | 18 (5 to 51)                       | 29 (10 to 65)                    | 0.0002   |
| <b>Hemodynamics</b>                                  |                                        |                                              |                                    |                                  |          |
| MPAP (mm/Hg)                                         | 29 (21 to 37)                          | 29 (21 to 36)                                | 29 (21 to 37)                      | 30 (22 to 37)                    | 0.03     |
| CI (L/min/m <sup>2</sup> )                           | 2.2 (1.8 to 2.6)                       | 2.2 (1.8 to 2.6)                             | 2.2 (1.8 to 2.7)                   | 2.2 (1.8 to 2.7)                 | 0.005    |
| PVRI (Woods Units/ m <sup>2</sup> )                  | 0.96 (0.62 to 1.47)                    | 0.95 (0.61 to 1.43)                          | 1.07 (0.69 to 1.64)                | 1.38 (0.89 to 2.10)              | 0.0001   |
| PCW (mm/Hg)                                          | 20 (13 to 27)                          | 19 (13 to 26)                                | 19 (13 to 26)                      | 20 (14 to 26)                    | 0.01     |
| <b>Acuity</b>                                        |                                        |                                              |                                    |                                  |          |
| Hosp, count (%)                                      | 56%                                    | 52%                                          | 52%                                | 60%                              | <0.001   |
| ICU, count (%)                                       | 40%                                    | 36%                                          | 37%                                | 45%                              | <0.001   |
| Inotropes, count (%)                                 | 43%                                    | 46%                                          | 43%                                | 50%                              | <0.001   |
| Mechanical assist support or ECMO                    | 18%                                    | 20%                                          | 20%                                | 17%                              | <0.001   |
| IABP, count (%)                                      | 5.1%                                   | 4.8%                                         | 5.2%                               | 6.7%                             | <0.001   |
| Vent, count (%)                                      | 2.9%                                   | 2.5%                                         | 2.5%                               | 3.5%                             | 0.002    |
| <b>Indication</b>                                    |                                        |                                              |                                    |                                  |          |
| CAD                                                  | 51%                                    | 50%                                          | 49%                                | 37%                              | <0.001   |
| DCM                                                  | 77%                                    | 79%                                          | 79%                                | 78%                              | 0.2      |
| DCM (nonischemic)                                    | 42%                                    | 40%                                          | 42%                                | 51%                              | <0.001   |
| Other                                                | 9%                                     | 9%                                           | 9%                                 | 13%                              | <0.001   |
| <b>Donor Factors</b>                                 |                                        |                                              |                                    |                                  |          |
| Male gender donor                                    | 21%                                    | 63%                                          | 80%                                | 91%                              | <0.001   |
| Age donor                                            | 36 (23 to 46)                          | 31 (21 to 42)                                | 28 (20 to 39)                      | 26 (19 to 38)                    | 0.0001   |
| BMI donor                                            | 24 (21 to 27)                          | 24 (22 to 28)                                | 25 (22 to 28)                      | 26 (23 to 30)                    | 0.0001   |
| <b>Cause of Death</b>                                |                                        |                                              |                                    |                                  |          |
| Anoxia                                               | 9%                                     | 9%                                           | 9%                                 | 9%                               |          |
| Stroke                                               | 43%                                    | 29%                                          | 22%                                | 20%                              |          |
| Head Trauma                                          | 42%                                    | 56%                                          | 62%                                | 65%                              |          |
| CNS tumor                                            | 1%                                     | 1%                                           | 1%                                 | 1%                               |          |
| Other                                                | 5%                                     | 5%                                           | 6%                                 | 5%                               |          |
| <b>Transplant factor</b>                             |                                        |                                              |                                    |                                  |          |
| Ischemic Time                                        | 3.1 (2.4 to 3.8)                       | 3.1 (2.4 to 3.7)                             | 3.0 (2.3 to 3.7)                   | 2.9 (2.2 to 3.6)                 | 0.0001   |
| Transplant year                                      |                                        |                                              |                                    |                                  | <0.001   |
| Prior to 1994                                        | 17%                                    | 13%                                          | 14%                                | 13%                              |          |
| 1995-1999                                            | 31%                                    | 26%                                          | 24%                                | 26%                              |          |
| 2000-2005                                            | 26%                                    | 26%                                          | 26%                                | 25%                              |          |
| After 2005                                           | 26%                                    | 35%                                          | 36%                                | 36%                              |          |
| <b>Rejection and Death Rates</b>                     |                                        |                                              |                                    |                                  |          |
| Treated for Acute Rejection in First Year (n=17,694) | 45%                                    | 39%                                          | 39%                                | 38%                              | <0.001   |
| 1 year mortality                                     | 14.1%                                  | 12.5%                                        | 11.4%                              | 12.4%                            | <0.001   |
| 5 year mortality                                     | 26.2%                                  | 23.3%                                        | 22.0%                              | 23.2%                            | <0.001   |

Data are presented as median (interquartile range) or as percentages. CAD: coronary artery disease, DCM: dilated cardiomyopathy, ECMO: extra-corporeal membranous oxygenation, IABP: intra-aortic balloon pump.

**Table S7: One and Five Year Survival and Rejection By Sizing Categories**

|                                 | Survival 1 yr       |        | Survival 5 yr       |        | Rejection treated in 1 <sup>st</sup> yr |        |
|---------------------------------|---------------------|--------|---------------------|--------|-----------------------------------------|--------|
|                                 | HR (95% CI)         | P      | HR (95% CI)         | P      | OR (95% CI)                             | P      |
| <b>Unadjusted Models</b>        |                     |        |                     |        |                                         |        |
| <b>Size Categories</b>          |                     |        |                     |        |                                         |        |
| Best matched                    | Referent            |        | Referent            |        | Referent                                |        |
| Moderately Undersized           | 1.10 (1.00 to 1.21) | 0.05   | 1.08 (1.01 to 1.16) | 0.03   | 1.04 (0.95 to 1.14)                     | 0.4    |
| Most Undersized                 | 1.27 (1.16 to 1.38) | <0.001 | 1.19 (1.11 to 1.27) | <0.001 | 1.33 (1.22 to 1.46)                     | <0.001 |
| Oversized                       | 1.08 (0.98 to 1.18) | 0.1    | 1.06 (0.99 to 1.13) | 0.1    | 0.99 (0.91 to 1.08)                     | 0.8    |
| <b>Gender Categories</b>        |                     |        |                     |        |                                         |        |
| Male Recipient / Male Donor     | Referent            |        | Referent            |        | Referent                                |        |
| Male Recipient / Female Donor   | 1.32 (1.22 to 1.43) | <0.001 | 1.21 (1.14 to 1.28) | <0.001 | 1.20 (1.10 to 1.30)                     | <0.001 |
| Female Recipient / Female Donor | 1.17 (1.06 to 1.29) | 0.002  | 1.14 (1.06 to 1.23) | 0.001  | 1.43 (1.31 to 1.58)                     | <0.001 |
| Female Recipient / Male Donor   | 1.17 (1.06 to 1.30) | 0.002  | 1.17 (1.09 to 1.26) | <0.001 | 1.51 (1.37 to 1.66)                     | <0.001 |
| Female Recipient / Male Donor†  | 1.00 (0.88 to 1.14) | 1.0    | 1.03 (0.94 to 1.13) | 0.5    | 1.05 (0.93 to 1.19)                     | 0.4    |
| <b>Adjusted Models‡</b>         |                     |        |                     |        |                                         |        |
| <b>Size Categories</b>          |                     |        |                     |        |                                         |        |
| Best matched                    | Referent            |        | Referent            |        | Referent                                |        |
| Moderately Undersized           | 1.11 (0.96 to 1.27) | 0.2    | 1.06 (0.96 to 1.18) | 0.2    | 1.05 (0.93 to 1.19)                     | 0.5    |
| Most Undersized                 | 1.22 (1.03 to 1.45) | 0.02   | 1.16 (1.03 to 1.31) | 0.02   | 1.24 (1.05 to 1.46)                     | 0.009  |
| Oversized                       | 0.92 (0.79 to 1.08) | 0.3    | 0.92 (0.82 to 1.03) | 0.2    | 0.75 (0.65 to 0.86)                     | <0.001 |
| <b>Gender Categories</b>        |                     |        |                     |        |                                         |        |
| Male Recipient / Male Donor     | Referent            |        | Referent            |        | Referent                                |        |
| Male Recipient / Female Donor   | 1.00 (0.85 to 1.17) | 1.0    | 0.95 (0.85 to 1.07) | 0.4    | 1.01 (0.87 to 1.17)                     | 0.9    |
| Female Recipient / Female Donor | 1.26 (1.37 to 1.92) | 0.003  | 1.18 (1.06 to 1.32) | 0.003  | 1.38 (1.20 to 1.58)                     | <0.001 |
| Female Recipient / Male Donor   | 1.62 (1.37 to 1.92) | <0.001 | 1.45 (1.29 to 1.64) | <0.001 | 1.51 (1.30 to 1.77)                     | <0.001 |
| Female Recipient / Male Donor†  | 1.29 (1.05 to 1.58) | 0.02   | 1.23 (1.06 to 1.42) | 0.005  | 1.10 (0.92 to 1.32)                     | 0.3    |

†Hazard ratio referent to female recipient / female donor pairings

‡Additional variables in the models included: recipient age, serum creatinine, total bilirubin, presence of diabetes, pulmonary vascular resistance index, hospitalized status, localization in intensive care unit, mechanical assistance through ventricular assist or extra-corporeal membranous oxygenation, inotrope use, primary indication for transplant, donor age, donor cause of death, ischemic time, and transplant era.
